# Supplementary material for: Impact of coordinated nitrogen atoms on the electrocatalytic water oxidation properties of copper complexes with pentadentate ligands
Source: Royal Society of Chemistry journal article supplement (doi:10.1039/d4nj03482a), 2025-01-01
Supplement: d4nj03482a1.pdf [file d4nj03482a1.pdf]

## Impact of the coordinated nitrogen atom on the electrocatalytic water oxidation properties of copper complexes with pentadentate ligands

Zhichao Qi,<sup>a</sup> Jinlin Hu,<sup>a</sup> Zhijun Ruan,<sup>a</sup> Yanmei Chen,<sup>a</sup> Yanbo Qu,<sup>\*a</sup> Xiangming Liang,<sup>\*b</sup> Junqi Lin<sup>\*a</sup>

<sup>a</sup> Hubei Key Laboratory of Processing and Application of Catalytic Materials, College of Chemistry and Chemical Engineering, Huanggang Normal University, Huanggang, 438000 China.

<sup>b</sup> School of Basic Medical Sciences, Ningxia Medical University, Yinchuan, 750004, China.

Email: pony029@126.com, liangxm6@163.com, linjunqi@hgnu.edu.cn

**Table 1** Crystal data and structure refinement for [Cu(tetren)](ClO<sub>4</sub>)<sub>2</sub>.

| Complex parameters | [Cu(tetren)](ClO <sub>4</sub> ) <sub>2</sub>                                   |
|--------------------|--------------------------------------------------------------------------------|
| Empirical formula  | C <sub>8</sub> H <sub>20</sub> Cl <sub>2</sub> CuN <sub>5</sub> O <sub>8</sub> |
| Formula weight     | 448.73                                                                         |
| Temperature / K    | 276.0                                                                          |
| Wavelength / Å     | 0.71073                                                                        |
| Crystal system     | monoclinic                                                                     |
| Space group        | Cc                                                                             |

|                                                   |                                                            |
|---------------------------------------------------|------------------------------------------------------------|
| $a / \text{\AA}$                                  | 8.3439(14)                                                 |
| $b / \text{\AA}$                                  | 15.187(3)                                                  |
| $c / \text{\AA}$                                  | 14.026(3)                                                  |
| $\alpha / \text{deg}$                             | 90                                                         |
| $\beta / \text{deg}$                              | 98.286(4)                                                  |
| $\gamma / \text{deg}$                             | 90                                                         |
| Volume / $\text{\AA}^3$                           | 1758.9(5)                                                  |
| Z                                                 | 4                                                          |
| Calculated density / $\text{g cm}^{-3}$           | 1.695                                                      |
| Absorption coefficient                            | 1.592                                                      |
| $F(000)$                                          | 920                                                        |
| Crystal size / mm                                 | $0.24 \times 0.35 \times 0.41 \text{ mm}^3$                |
| $\theta$ range / deg                              | 2.682 to 20.068                                            |
| Index ranges                                      | $-9 \leq h \leq 9, -18 \leq k \leq 18, -16 \leq l \leq 16$ |
| Reflections collected                             | 12490                                                      |
| Independent reflections                           | 3124 [R(int) = 0.1276]                                     |
| Completeness to $\theta = 24.792^\circ$           | 99.9 %                                                     |
| Absorption correction                             | Semi-empirical from equivalents                            |
| Max. and min. transmission                        | 0.7451 and 0.6188                                          |
| Data / restraints / parameters                    | 3124 / 2 / 226                                             |
| Goodness-of-fit on $F^2$                          | 1.035                                                      |
| Final R indices [ $I \geq 2\sigma(I)$ ]           | $R_1 = 0.0627, wR_2 = 0.1369$                              |
| R indices (all data)                              | $R_1 = 0.1179, wR_2 = 0.1641$                              |
| Largest diff. peak and hole / $\text{e \AA}^{-3}$ | 0.33/-0.36                                                 |

$$R_1 = \Sigma||F_o| - |F_c||/\Sigma|F_o|, wR_2 = [\Sigma(|F_o|^2 - |F_c|^2)^2/\Sigma(F_o^2)]^{1/2}$$

**Table 2** Crystal data and structure refinement for [Cu(pydien)](ClO<sub>4</sub>)<sub>2</sub>.

| Complex parameters        | [Cu(pydien)](ClO <sub>4</sub> ) <sub>2</sub> ( <b>2</b> )                       |
|---------------------------|---------------------------------------------------------------------------------|
| Empirical formula         | C <sub>16</sub> H <sub>23</sub> Cl <sub>2</sub> CuN <sub>5</sub> O <sub>8</sub> |
| Formula weight            | 547.83                                                                          |
| Temperature / K           | 293(2)                                                                          |
| Wavelength / $\text{\AA}$ | 0.71073                                                                         |
| Crystal system            | Orthorhombic                                                                    |

|                                                 |                                                                 |
|-------------------------------------------------|-----------------------------------------------------------------|
| Space group                                     | Pbca                                                            |
| <i>a</i> / Å                                    | 14.9870(3)                                                      |
| <i>b</i> / Å                                    | 9.9557(3)                                                       |
| <i>c</i> / Å                                    | 29.6358(7)                                                      |
| $\alpha$ / deg                                  | 90                                                              |
| $\beta$ / deg                                   | 90                                                              |
| $\gamma$ / deg                                  | 90                                                              |
| Volume / Å <sup>3</sup>                         | 4421.84(19)                                                     |
| Z                                               | 8                                                               |
| Calculated density / g cm <sup>-3</sup>         | 1.646                                                           |
| Absorption coefficient                          | 1.283                                                           |
| <i>F</i> (000)                                  | 2248                                                            |
| Crystal size / mm                               | 0.27 × 0.21 × 0.19 mm <sup>3</sup>                              |
| $\theta$ range / deg                            | 1.933 to 24.792                                                 |
| Index ranges                                    | -17 ≤ <i>h</i> ≤ 16, -11 ≤ <i>k</i> ≤ 11, -34 ≤ <i>l</i> ≤ 34   |
| Reflections collected                           | 55423                                                           |
| Independent reflections                         | 3797 [R(int) = 0.0710]                                          |
| Completeness to $\theta = 24.792^\circ$         | 99.9 %                                                          |
| Absorption correction                           | Semi-empirical from equivalents                                 |
| Max. and min. transmission                      | 0.7451 and 0.6188                                               |
| Data / restraints / parameters                  | 3797 / 20 / 313                                                 |
| Goodness-of-fit on <i>F</i> <sup>2</sup>        | 1.088                                                           |
| Final R indices [ <i>I</i> ≥ 2σ( <i>I</i> )]    | <i>R</i> <sub>1</sub> = 0.0830, <i>wR</i> <sub>2</sub> = 0.2644 |
| R indices (all data)                            | <i>R</i> <sub>1</sub> = 0.1044, <i>wR</i> <sub>2</sub> = 0.2947 |
| Largest diff. peak and hole / e Å <sup>-3</sup> | 1.580 and -0.966 e.Å <sup>-3</sup>                              |

$$R_1 = \Sigma||F_o| - |F_c||/\Sigma|F_o|, wR_2 = [\Sigma(|F_o|^2 - |F_c|^2)^2/\Sigma(F_o^2)]^{1/2}$$

**Table S3** Selected bond lengths (Å) and angles (deg) for complex **1** and **2**.

| Complex         | <b>1</b>  | <b>2</b> |
|-----------------|-----------|----------|
| Bond length (Å) |           |          |
| Cu–N1           | 2.114(13) | 2.029(6) |
| Cu–N2           | 1.995(17) | 1.966(8) |
| Cu–N3           | 2.038(12) | 2.005(7) |
| Cu–N4           | 2.014(16) | 2.155(6) |

|                   |           |           |
|-------------------|-----------|-----------|
| Cu–N5             | 2.061(13) | 2.108(5)  |
| Bond angles (deg) |           |           |
| N1–Cu–N2          | 84.8(6)   | 83.1(2)   |
| N1–Cu–N3          | 115.4(6)  | 162.3(3)  |
| N1–Cu–N4          | 104.8(6)  | 106.8(2)  |
| N1–Cu–N5          | 108.6(6)  | 96.98(19) |
| N2–Cu–N3          | 84.4(6)   | 79.2(3)   |
| N2–Cu–N4          | 167.9(7)  | 129.4(4)  |
| N2–Cu–N5          | 99.2(6)   | 149.4(4)  |
| N3–Cu–N4          | 84.8(7)   | 84.7(3)   |
| N3–Cu–N5          | 136.0(6)  | 98.2(3)   |
| N4–Cu–N5          | 84.8(6)   | 80.1(2)   |

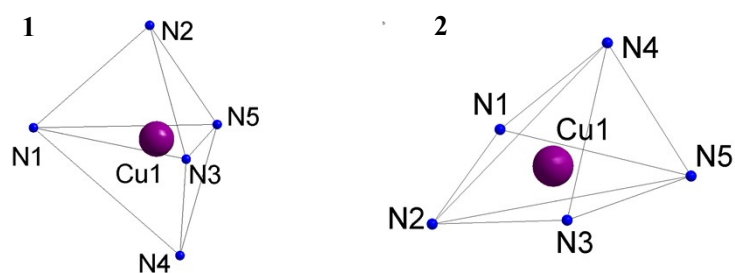

**Fig. S1** The geometry configuration of complex 1 (left) and complex 2 (right).

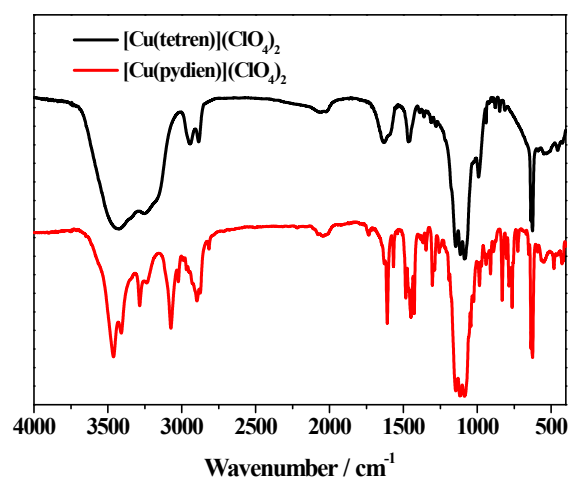

**Fig. S2** Infrared spectrum of complex 1 and complex 2.

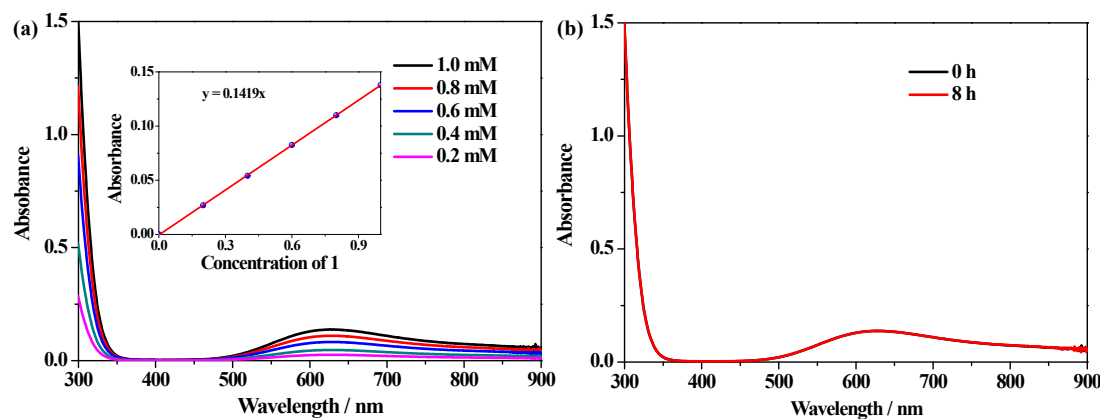

**Fig. S3** (a) Concentration-dependent UV-vis absorption spectra of **1** in 0.1 M PBS at pH 8.0; (b) Time-dependent UV-vis absorption spectra of 1 mM of **1** in 0.1 M PBS at pH 8.0.

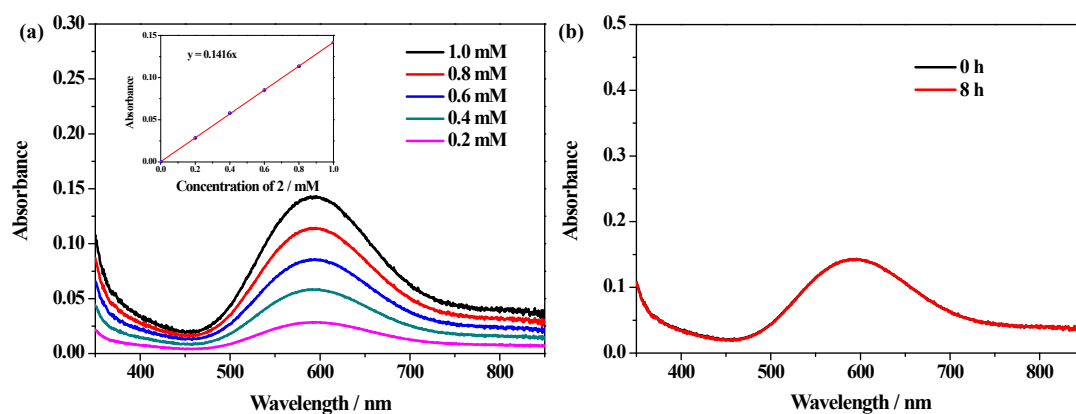

**Fig. S4** (a) Concentration-dependent UV-vis absorption spectra of **2** in 0.1 M PBS at pH 8.0; (b) Time-dependent UV-vis absorption spectra of 1 mM of **2** in 0.1 M PBS at pH 8.0.

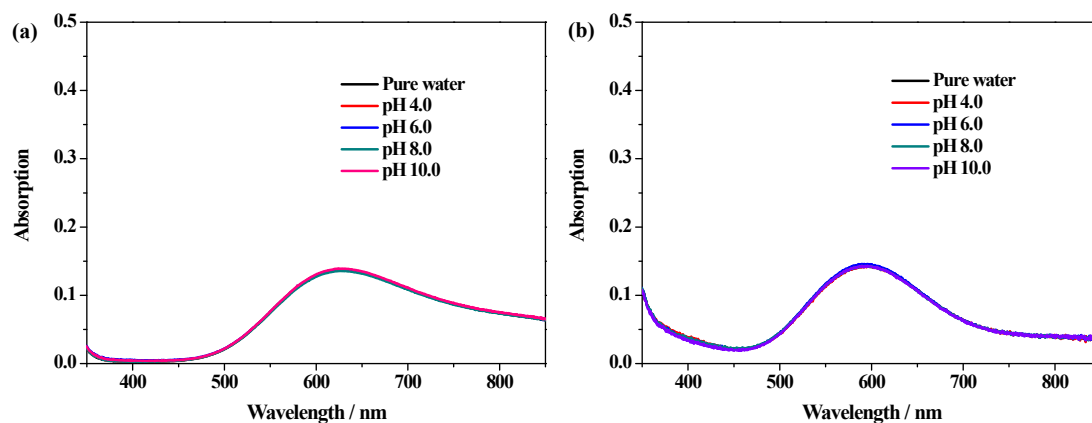

**Fig. S5** UV-vis absorption spectra of **1** (a) and **2** (b) in pure water and 0.1 M PBS at various pH value.

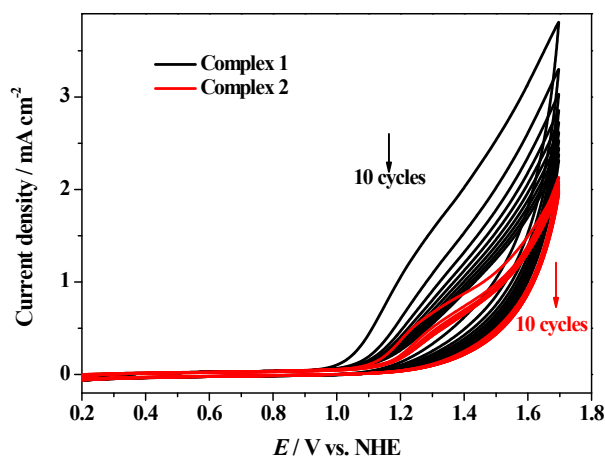

**Fig. S6** Consecutive CV cyclic scan curves of 1 mM of **1** and **2** in 0.1 M PBS at pH 8.0, scan rate = 100 mV/s.

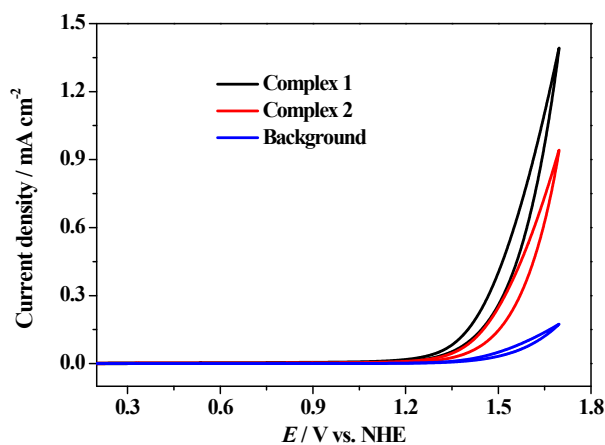

**Fig. S7** CV tests of **1** and **2** in 0.1 M PBS at pH 8.0 with scan rates = 100 mV/s, ITO electrode was used as working electrode.

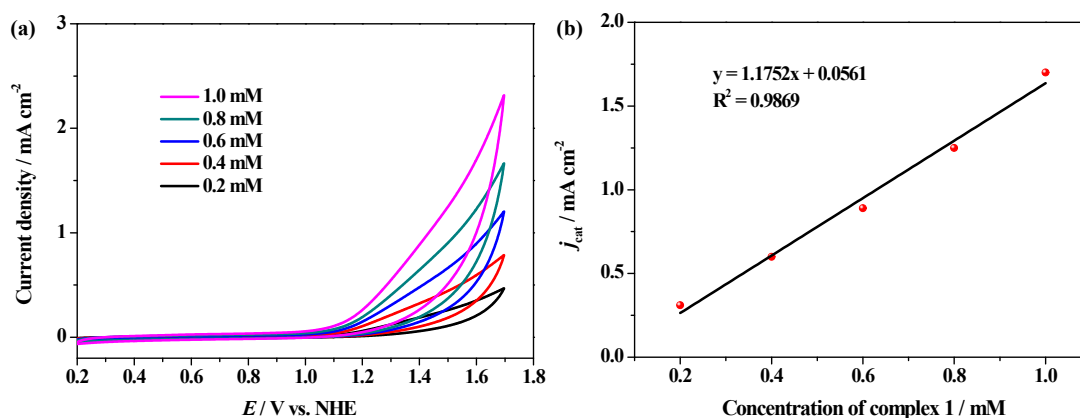

**Fig. S8** CV of various concentration of **1** at pH 8.0 with scan rate of 100 mV / s (a) and the dependence of catalytic current density at 1.60 V vs. NHE on the concentration of **1** (b).

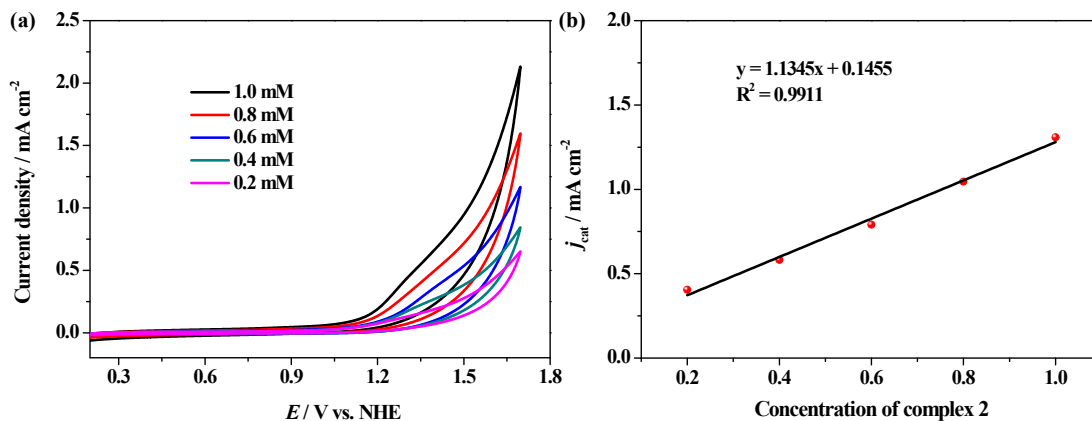

**Fig. S9** CV of various concentration of **2** at pH 8.0 with scan rate of 100 mV / s (a) and the dependence of catalytic current density at 1.60 V vs. NHE on the concentration of **2** (b).

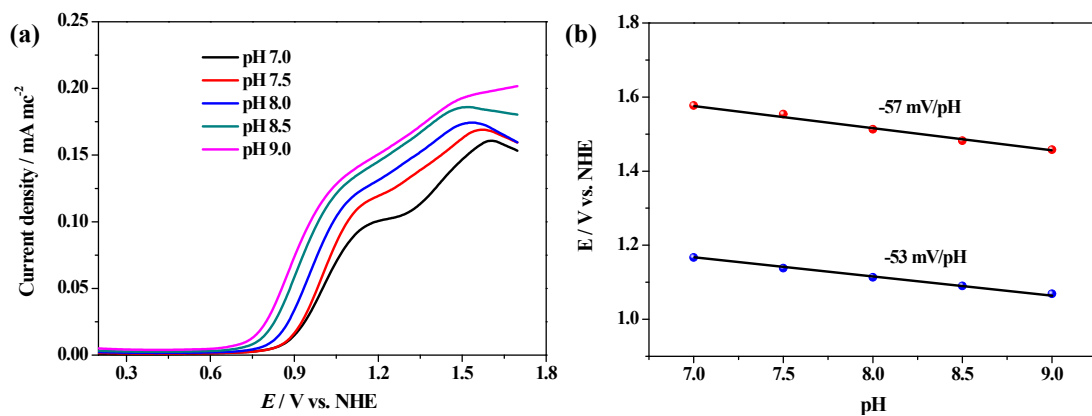

**Fig. S10** DPV test of 1 mM **1** in 0.1 M PBS at various pH values (a) and the relationship between the potential of each redox couple of **1** and the pH of electrolyte (b).

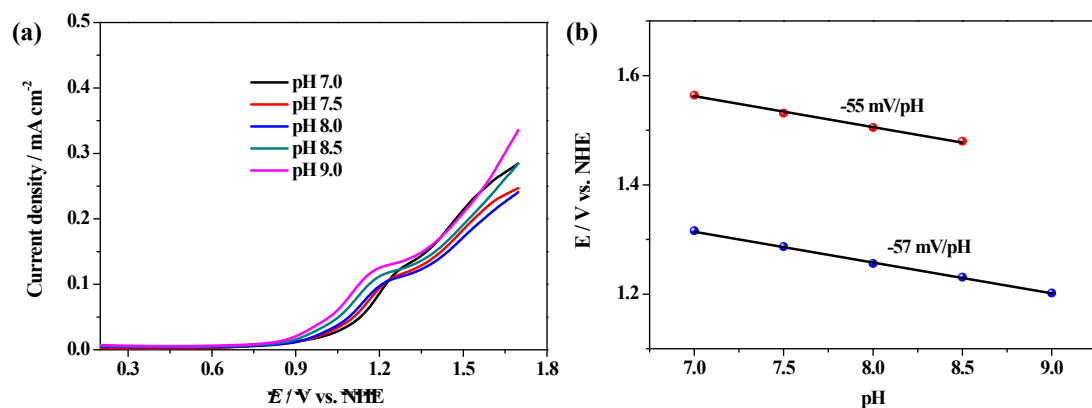

**Fig. S11** DPV test of 1 mM **2** in 0.1 M PBS at various pH values (a) and the relationship between the potential of each redox couple of **2** and the pH of electrolyte (b).

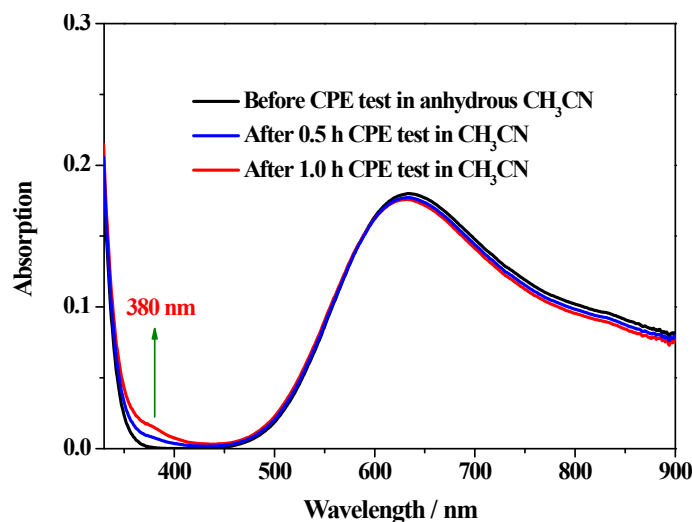

**Fig. S12** UV-vis absorbance of 1mM of **1** before and after CPE test at 1.15 V vs. Fc/Fc<sup>+</sup>, anhydrous CH<sub>3</sub>CN containing 0.1 M tetrabutylammonium hexafluorophosphate as electrolyte.

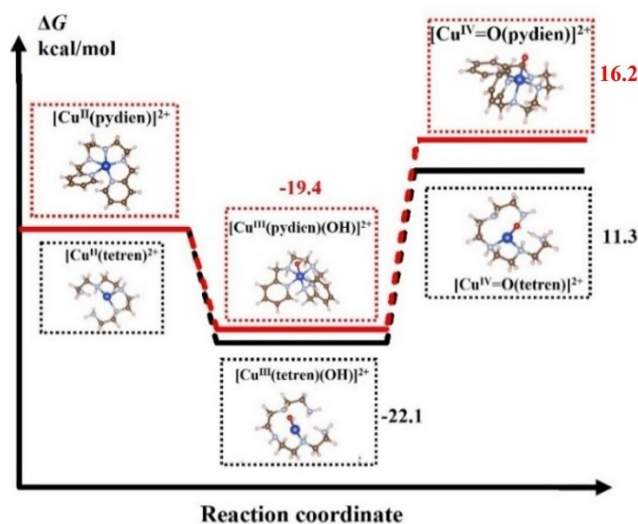

**Fig. S13** Relative free energy ( $\Delta G$ ) diagram of the oxidation process of **1** and **2**. DFT calculations were conducted through the Vienna ab initio Simulation Package (VASP) with the projector augment wave method.<sup>S1-S2</sup> Generalized gradient approximation of the Perdew-Burke-Ernzerhof (PBE) functional was used as the exchange-correlation functional.<sup>S3</sup> The Brillouin zone was sampled with  $2 \times 2 \times 1$  K points for surface calculation. The cutoff energy was set as 500 eV, and structure relaxation was performed until the convergence criteria of energy and force reached  $1 \times 10^{-5}$  eV and  $0.02 \text{ eV \AA}^{-1}$ , respectively. A vacuum layer of 15 Å was constructed to eliminate interactions between periodic structures of surface models. The van der Waals (vdW) interaction was amended by the zero damping DFT-D3 method of



Grimme.<sup>S4</sup> The Gibbs free energy was calculated as  $\Delta G = \Delta E + \Delta E_{ZPE} - T\Delta S$ , where the  $\Delta E$ ,  $\Delta E_{ZPE}$ , and  $\Delta S$  are electronic energy, zero-point energy, and entropy difference between products and reactants. The zero-point energies of isolated and adsorbed intermediate products were calculated from the frequency analysis. The vibrational frequencies and entropies of molecules in the gas phase were obtained from the National Institute of Standards and Technology (NIST) database.<sup>S5-S6</sup>

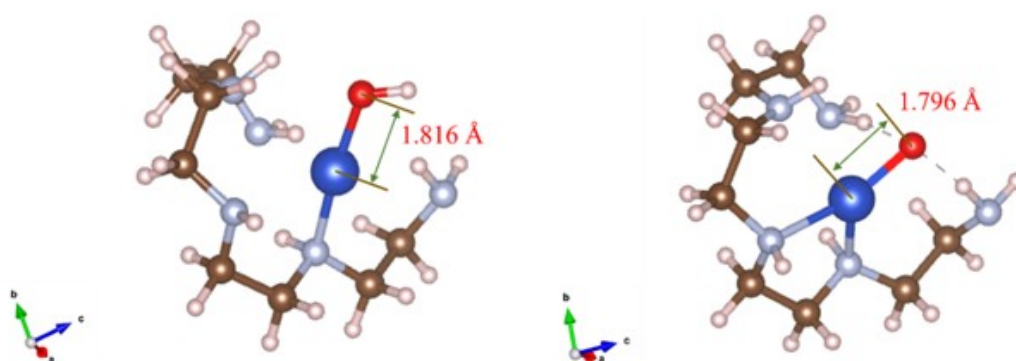

**Fig. S14** The calculated Cu–O bond length in the Cu(III)–OH species (left) and Cu(III)–oxyl radical species (right).

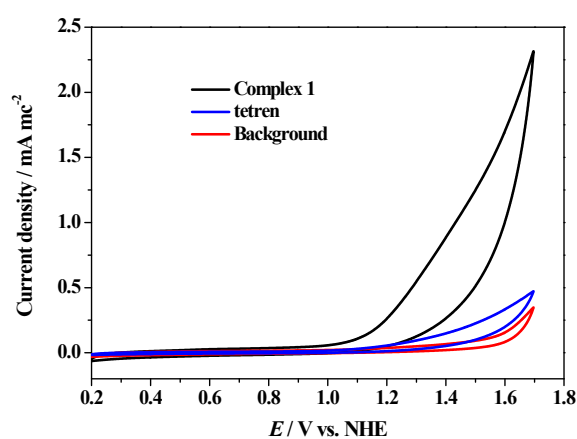

**Fig. S15** CV tests of 1 mM of **1** and the ligand tetraethylenepentamine in 0.1 M PBS at pH 8.0 with scan rates = 100 mV / s, GC electrode was used as working electrode.

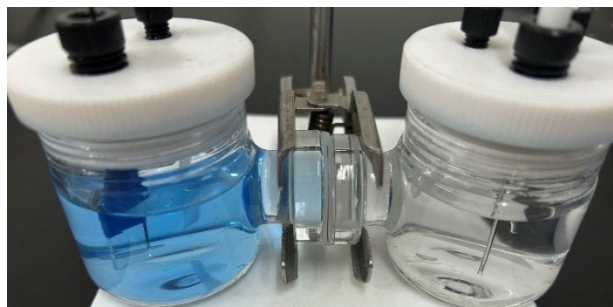

**Fig. S16** Picture of the two-compartment electrochemical cell used for CPE experiments; 0.1 M PBS (pH 8.0) containing 1 mM of **1** was used as electrolyte and potential was controlled at 1.60 V vs. NHE.

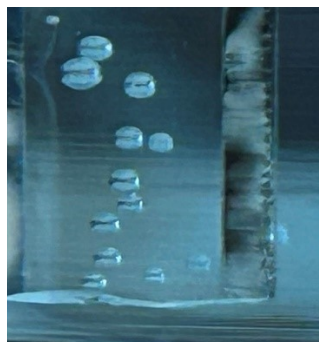

**Fig. S17** The oxygen bubbles generated on the surface of ITO electrode during CPE test of **1**.

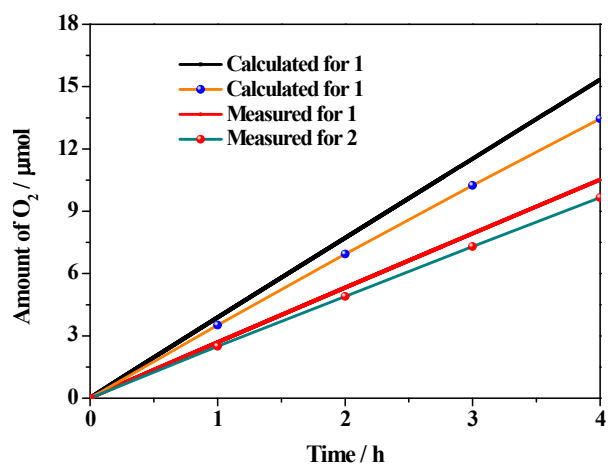

**Fig. S18** Faraday efficiency of CPE test of **1** and **2** at 1.60 V vs. NHE, 0.1 M PBS at pH 8.0 was used as electrolyte in a H-shape two-compartment cell.

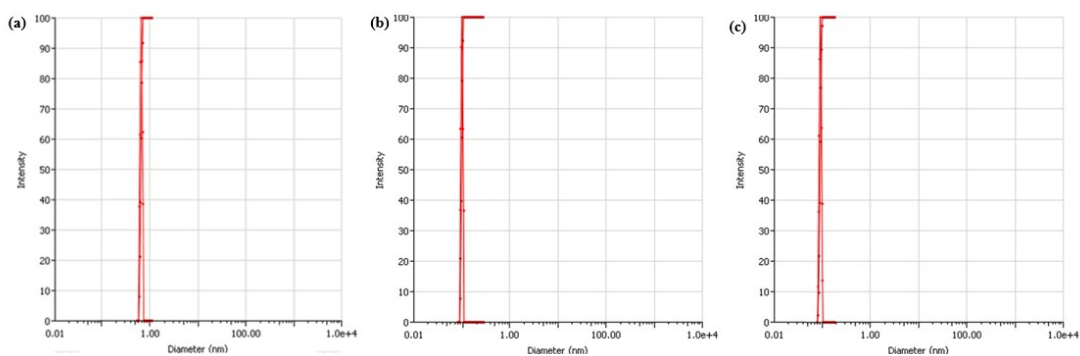

**Fig. S19** DLS measurement of fresh PBS (a); DLS measurement of PBS after 4 h CPE test of **1** (b) and **2** (c). Signal below 1 nm is ascribed to the background signal of true solution.

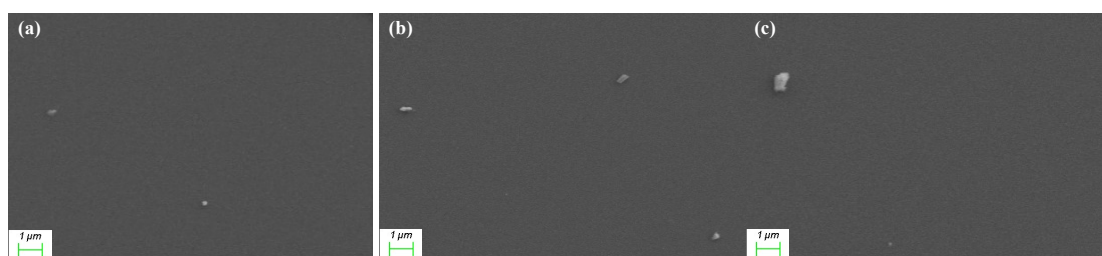

**Fig. S20** The SEM images of the clean ITO electrode (a) and the ITO electrode used for electrolysis test of **1** (b) and **2** (c).

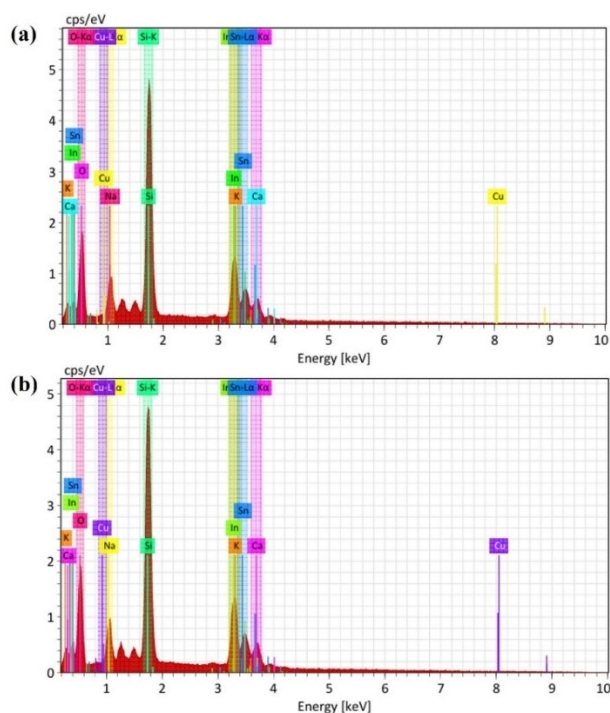

**Fig. S21** EDS analysis results of the surface of ITO electrode after 4 h CPE experiments of **1** (a) and **2** (b) in 0.1 M PBS at pH 8.0.

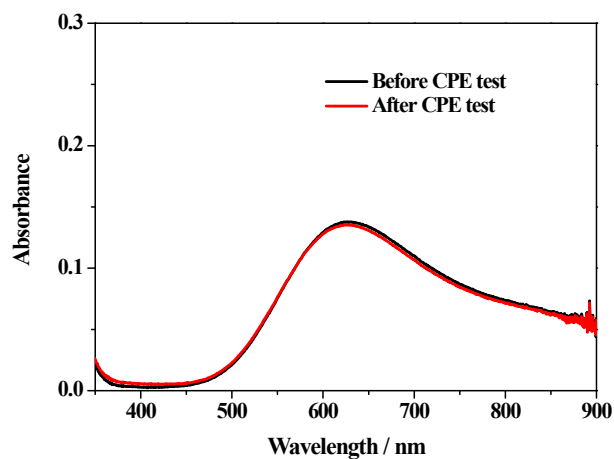

**Fig. S22** UV-vis absorbance spectra of 1 mM of **1** before and after 4 h CPE test in the H-shape two-compartment cell with 0.1 M PBS at pH 8.0 as electrolyte.

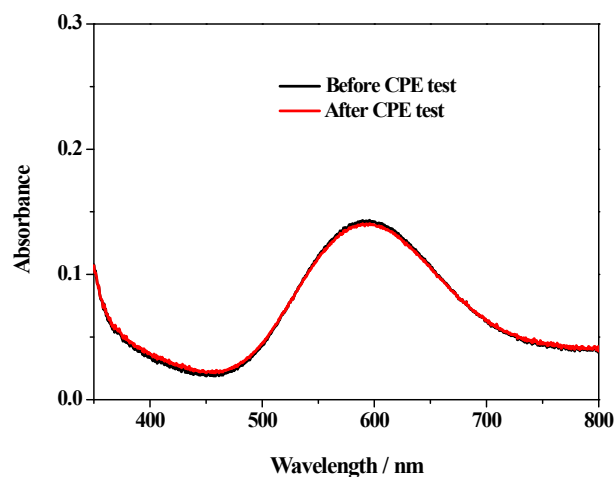

**Fig. S23** UV-vis absorbance spectra of 1 mM of **2** before and after 4 h CPE test in the H-shape two-compartment cell with 0.1 M PBS at pH 8.0 as electrolyte.

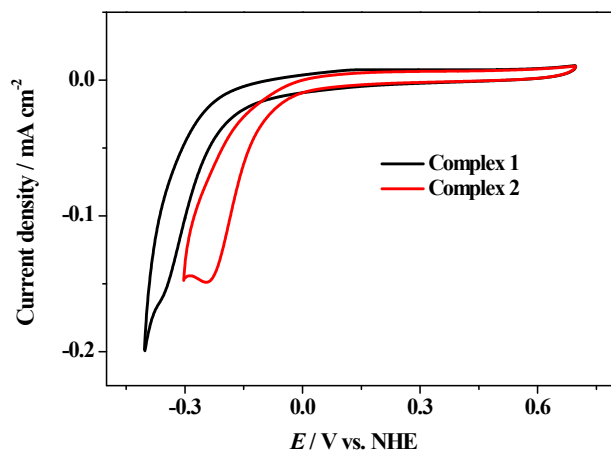

**Fig. S24** The Cu<sup>I</sup>/Cu<sup>II</sup> couple of **1** and **2** in 0.1 M PBS at pH 8.0, scan rate = 100 mV/s.

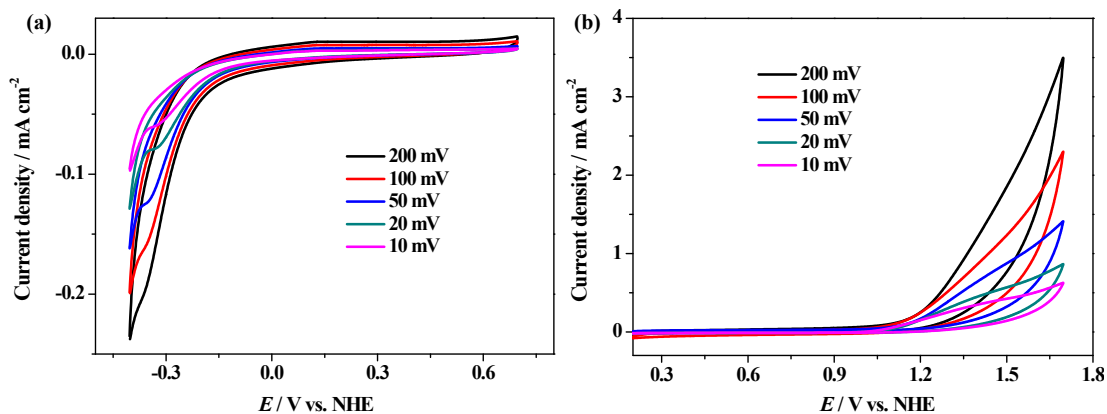

**Fig. S25** Cu<sup>I</sup>/Cu<sup>II</sup> redox couple of 1.0 mM of **1** with various scan rate (a) and CV of 1.0 mM of **1** in 0.1 M PBSs with scan rate varying from 10 to 200 mV s<sup>-1</sup> (b).

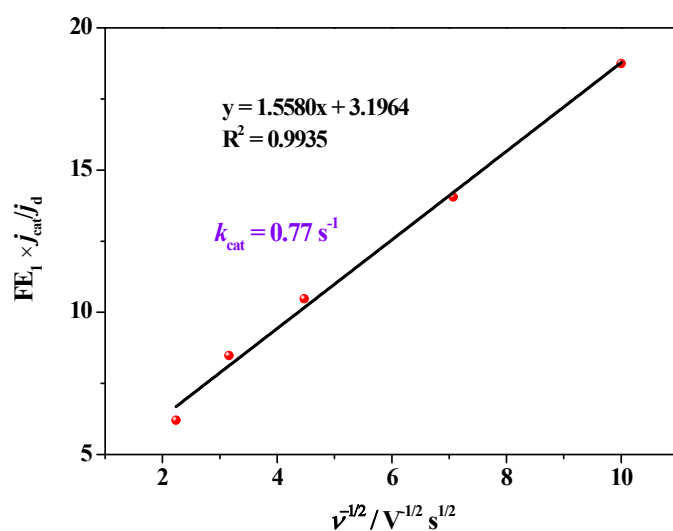

**Fig. S26** Plots of the ratio of  $FE_1 \times j_{cat}$  to  $j_d$  of **1** versus the reciprocal of square root of scan rate.

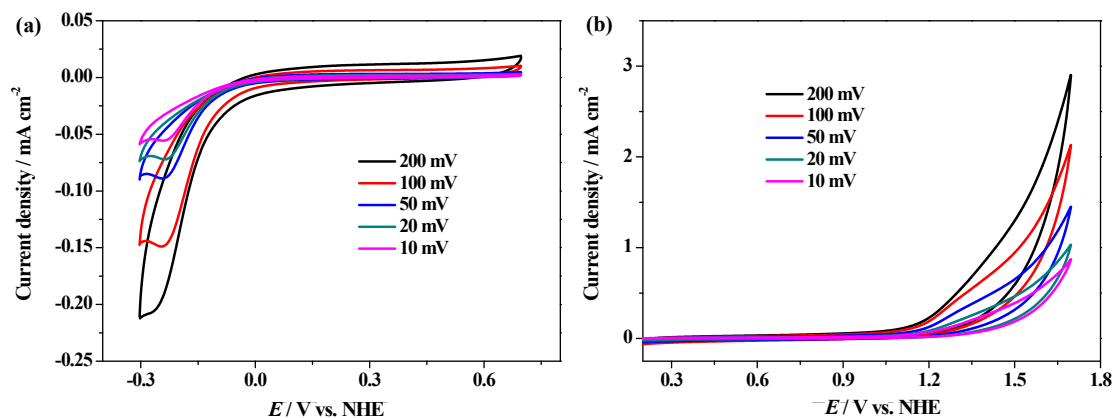

**Fig. S27** Cu<sup>I</sup>/Cu<sup>II</sup> redox couple of 1.0 mM of **2** with various scan rate (a) and CV of 1.0 mM of **2** in 0.1 M PBSs with scan rate varying from 10 to 200 mV s<sup>-1</sup> (b).

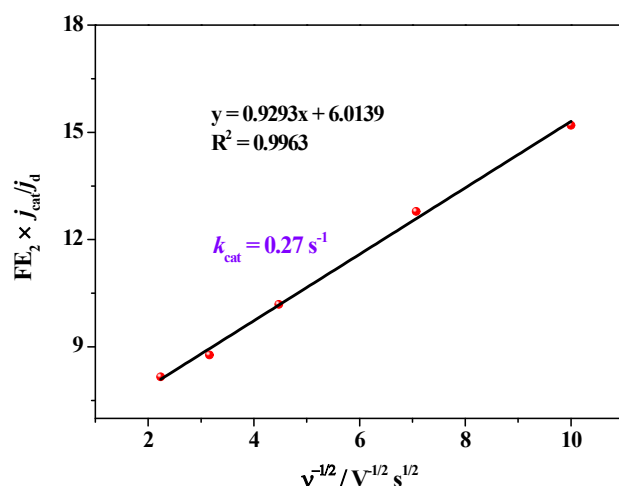

**Fig. S28** Plots of the ratio of  $FE_2 \times j_{cat}$  to  $j_d$  of **2** versus the reciprocal of square root of scan rate.

**Table S4** Onset overpotential and TOF value of **1** and some reported Cu based molecular WOC

| Catalyst                                                                | pH   | TOF /s <sup>-1</sup> | $\eta$ /mV <sup>a</sup> | Ref.      |
|-------------------------------------------------------------------------|------|----------------------|-------------------------|-----------|
| [Cu <sub>2</sub> (BPMAN)( $\mu$ -OH)] <sup>3+</sup>                     | 7.0  | 0.6                  | 800                     | S7        |
| [Cu <sub>2</sub> (TPMAN)( $\mu$ -OH)(H <sub>2</sub> O)] <sup>3+</sup>   | 7.0  | 0.78                 | 780                     | S8        |
| [Cu <sub>3</sub> (pda) <sub>3</sub> ( <sup>t</sup> BuPO <sub>3</sub> )] | 7.0  | 0.82                 | 800                     | S9        |
| [Cu(mpydien)] <sup>2+</sup>                                             | 7.0  | 0.04                 | 640                     | S10       |
| [Cu(en) <sub>2</sub> (OH <sub>2</sub> ) <sub>2</sub> ] <sup>2+</sup>    | 8.0  | 0.4                  | 440                     | S11       |
| [Cu(F <sub>3</sub> TPA)] <sup>2+</sup>                                  | 8.5  | 0.38                 | 610                     | S12       |
| [Cu(dmabpy)] <sup>2+</sup>                                              | 9.0  | 0.11                 | 600                     | S13       |
| [Cu(mabpy)] <sup>2+</sup>                                               | 9.0  | 0.06                 | 870                     | S13       |
| [Cu(N <sub>2</sub> Py <sub>3</sub> )] <sup>2+</sup>                     | 11.0 | 0.81                 | 831                     | S14       |
| [Cu(H <sub>2</sub> L)(OH) <sub>2</sub> ]                                | 12.4 | 0.4                  | 640                     | S15       |
| [Cu(pyalk) <sub>2</sub> ]                                               | 12.5 | 0.7                  | 550                     | S16       |
| [Cu <sup>II</sup> (L)] <sup>2+</sup>                                    | 12.9 | 0.12                 | 830                     | S17       |
| <b>1</b>                                                                | 8.0  | 0.77                 | 521                     | This work |
| <b>2</b>                                                                | 8.0  | 0.27                 | 531                     | This work |

<sup>a</sup>  $\eta$  = onset overpotential

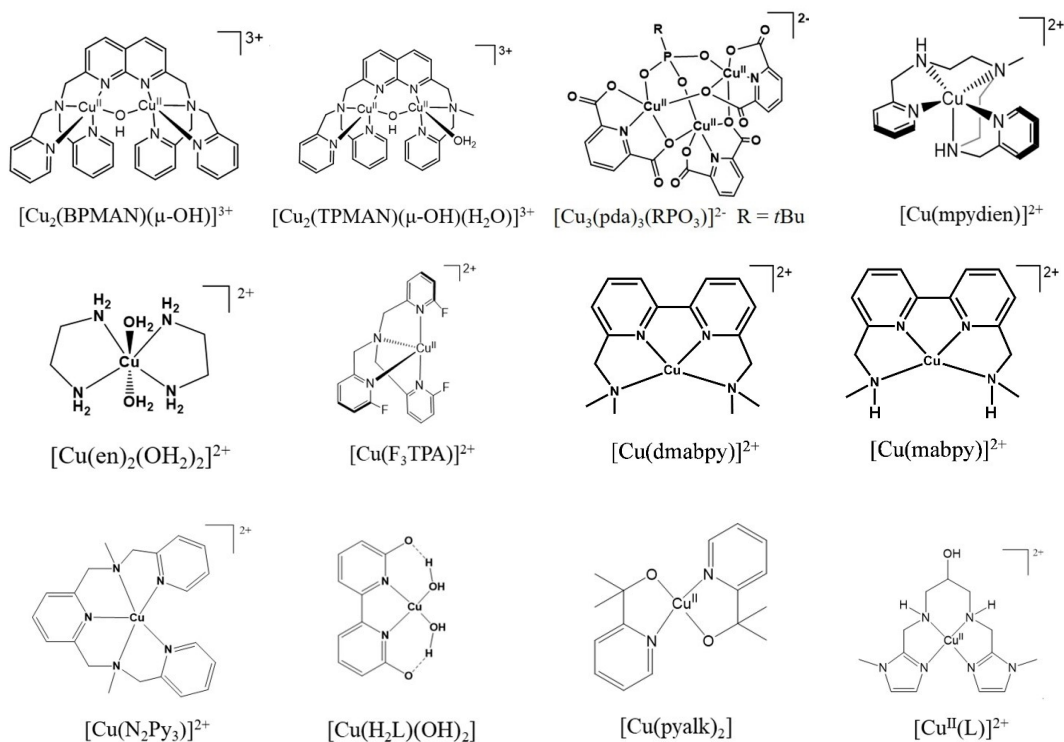

## References

- 1 G. Kresse and D. Joubert, *Phys. Rev. B*, 1999, **59**, 1758–1775.
- 2 P. E. Blöchl, *Phys. Rev. B*, 1994, **50**, 17953–17979.
- 3 J. P. Perdew, K. Burke and M. Ernzerhof, *Phys. Rev. Lett.*, 1996, **77**, 3865–3868.
- 4 S. Grimme, S. Ehrlich and L. Goerigk, *J. Comput. Chem.*, 2011, **32**, 1456–1465.
- 5 J. K. Nørskov, J. Rossmeisl, A. Logadottir, L. Lindqvist, J. R. Kitchin, T. Bligaard and H. Jónsson, *J. Phys. Chem. B*, 2004, **108**, 17886–17892.
- 6 J. K. Nørskov, T. Bligaard, A. Logadottir, J. R. Kitchin, J. G. Chen, S. Pandalov and U. Stimming, *J. Electrochem. Soc.*, 2005, **152**, J23.
- 7 X.-J. Su, M. Gao, L. Jiao, R.-Z. Liao, P. E. M. Siegbahn, J.-P. Cheng and M.-T. Zhang, *Angew. Chem., Int. Ed.*, 2015, **54**, 4909–4914.
- 8 Q.-Q. Hu, X.-J. Su and M.-T. Zhang, *Inorg. Chem.*, 2018, **57**, 10481–10484.
- 9 J.-M. Wang, Y.-R. Liu, X.-Y. Mao, N.-N. Shi, X. Zhang, H.-S. Wang, Y.-H. Fan and M. Wang, *Chem.–Asian J.*, 2019, **14**, 2685–2693.
- 10 24 J. Lin, N. Wang, X. Chen, X. Yang, L. Hong, Z. Ruan, H. Ye, Y. Chen and X. Liang, *Sustainable Energy Fuels*, 2022, **6**, 1312–1318.
- 11 C. Lu, J. Du, X. J. Su, M. T. Zhang, X. Xu, T. J. Meyer and Z. Chen, *ACS Catal.*,

- 2016, **6**, 77–83.
- 12 R.-J. Xiang, H.-Y. Wang, Z.-J. Xin, C.-B. Li, Y.-X. Lu, X.-W. Gao, H.-M. Sun and R. Cao, *Chem. Eur. J.*, 2016, **22**, 1602–1607.
- 13 J. Wang, Y. Ping, Y. Chen, S. Liu, J. Dong, Z. Ruan, X. Liang and J. Lin, *Dalton Trans.*, 2024, **53**, 5222–5229.
- 14 Z. Xu, Z. Zheng, Q. Chen, J. Wang, K. Yu, X. Xia, J. Shen and Q. Zhang, *Dalton Trans.*, 2021, **50**, 10888–10895.
- 15 T. Zhang, C. Wang, S. Liu, J. L. Wang and W. Lin, *J. Am. Chem. Soc.*, 2014, **136**, 273–281.
- 16 K. J. Fisher, K. L. Materna, B. Q. Mercado, R. H. Crabtree and G. W. Brudvig, *ACS Catal.*, 2017, **7**, 3384–3387.
- 17 S. Nestke, E. Ronge and I. Siewert, *Dalton Trans.*, 2018, **47**, 10737–10741.
